# Supplementary material
Source: PubMed Central journal article supplement (PMC2998181)
Supplement: NIHMS252533-supplement-S1_caption.pdf [file NIHMS252533-supplement-S1_caption.pdf]

*Figure Legend*

**Figure S1. Receiver operating characteristic (ROC) curve for urine *PSA* for the diagnosis of prostate cancer.** ROC was performed for urine *PSA* normalized to *GAPDH* (n = 234; n =138 patients with prostate cancer (86 positive needle biopsy and 52 radical prostatectomy patients) and n = 96 patients with negative needle biopsies). Area under the curve (AUC) for *PSA* is 0.44 with p=0.11.
