# Supplementary material
Source: PubMed Central journal article supplement (PMC2998181)
Supplement: NIHMS252533-supplement-Table_S1.pdf [file NIHMS252533-supplement-Table_S1.pdf]

**Table S1. Clinical and pathology characteristics for the patients presenting for prostate biopsy or radical prostatectomy.** Information is given for the 234 total patients included in the final analysis. The number of patients with available information for each class is indicated.

| <b>Characteristic</b>             | <b>Value</b>    |
|-----------------------------------|-----------------|
| Mean age (yr) $\pm$ SEM *         | 62.8 $\pm$ 8.1  |
| Mean gland weight (g) $\pm$ SEM # | 48.5 $\pm$ 16.5 |
| Mean tumor size (cm) $\pm$ SEM †  | 1.3 $\pm$ 0.7   |
| <b>PSA @</b>                      |                 |
| Mean (ng/ml) $\pm$ SEM            | 7.9 $\pm$ 9.1   |
| 0-2.5 ng/ml (%)                   | 8.6%            |
| 2.6 –10 ng/ml (%)                 | 71.7%           |
| 4- 10 ng/ml (%)                   | 56.7%           |
| > 10 ng/ml (%)                    | 19.7%           |
| <b>Gleason grade •</b>            |                 |
| =< 6 (%)                          | 46.7%           |
| >=7 (%)                           | 53.3%           |
| <b>True Positive (n=90)</b>       |                 |
| =< 6 (%)                          | 43.3%           |
| >=7 (%)                           | 56.7%           |
| <b>False Negative (n=47)</b>      |                 |
| =< 6 (%)                          | 53.2%           |
| >=7 (%)                           | 46.8%           |
| <b>Stage †</b>                    |                 |
| T1 (%)                            | 82.9%           |
| T2 (%)                            | 16.3%           |
| T3 (%)                            | 0.8%            |
| <b>True Positive (n=82)</b>       |                 |
| T1 (%)                            | 84.1%           |
| T2 (%)                            | 14.6%           |
| T3 (%)                            | 1.2%            |
| <b>False Negative (n=47)</b>      |                 |
| T1 (%)                            | 80.9%           |
| T2 (%)                            | 19.1%           |
| T3 (%)                            | 0.0%            |
| <b>Ethnicity ‡</b>                |                 |
| White (%)                         | 91%             |
| Asian or Pacific Islander (%)     | 1.7%            |
| Black (%)                         | 4.2%            |
| Unknown (%)                       | 3.0%            |

\* Data were available for 234 patients only.

# Data were available for 53 patients only.

† Data were available for 52 patients only.

‡ Data were available for 234 patients only

@ Data were available for 233 patients only

• Data were available for 137 patients only

† Data were available for 129 patients only
