# Supplementary material
Source: PubMed Central journal article supplement (PMC2998181)
Supplement: NIHMS252533-supplement-Table_S2.pdf [file NIHMS252533-supplement-Table_S2.pdf]

**Table S2. Oligonucleotide primers used for qPCR.** Oligonucleotide primers used for SYBR green qPCR are indicated and oligonucleotide primers/MGB probe used for Taqman qPCR are indicated in italics.

|                           |                                |
|---------------------------|--------------------------------|
| GOLPH2-f                  | CTGGTGGCCTGCATCATCGTCTTG       |
| GOLPH2-r                  | GCTGCTCCCGCTGCTTCTCCA          |
| PCA3-f                    | CATGGTGGGAAGGACCTGATGATAC      |
| PCA3-r                    | GATGTGTGGCCTCAGATGGTAAAGTC     |
| SPINK1-f                  | CAAAAATCTGGGCCTTGCTGAGAAC      |
| SPINK1-r                  | AGGCCTCGCGGTGACCTGAT           |
| TFF3-f                    | AACCGGGGCTGCTGCTTTGACTC        |
| TFF3-r                    | TCCTGCAGGGGCTTGAAACACCA        |
| <i>TM-ERGa3-MGB-f</i>     | <i>CTGGAGCGCGGCAGGAA</i>       |
| <i>TM-ERGa3 MGB-r</i>     | <i>CCGTAGGCACACTCAAACAACGA</i> |
| <i>TM-ERGa3_MGB-probe</i> | <i>TTATCAGTTGTGAGTGAGGAC</i>   |
