# Supplementary material
Source: PubMed Central journal article supplement (PMC2998181)
Supplement: NIHMS252533-supplement-Table_S3.pdf [file NIHMS252533-supplement-Table_S3.pdf]

**Table S3. Significance (P-value) of associations between univariate test variables and clinical risk stratifications.**

| Risk Factor Variable                          | D'Amico risk group | Clinical stage T1c vs. T2+ | Higher prob NOC vs OC <sup>#</sup> | Kattan 5yr Progression free <sup>#</sup> | Major Gleason |
|-----------------------------------------------|--------------------|----------------------------|------------------------------------|------------------------------------------|---------------|
| PCA3<br>SPINK1<br>TMPRSS2:ERG<br>ERG<br>AMACR |                    | 0.05 (T2+)                 |                                    |                                          | 0.01 (high)   |
| GOLPH2<br>TFF3                                |                    |                            | 0.007 (NOC)                        |                                          | 0.008 (high)  |

| Risk Factor Variable                                            | Biopsy high risk vs low risk <sup>\$</sup> | Pathologic stage NOC vs. OC <sup>^</sup> | Max tumor diameter | # positive cores | % cores positive |
|-----------------------------------------------------------------|--------------------------------------------|------------------------------------------|--------------------|------------------|------------------|
| PCA3<br>SPINK1<br>TMPRSS2:ERG<br>ERG<br>AMACR<br>GOLPH2<br>TFF3 | 0.02 (high)                                |                                          |                    |                  |                  |

# Kattan preoperative nomograms

<sup>^</sup> Non organ confined vs. organ confined

<sup>\$</sup> Novel risk group stratification. All Gleason 8+, stage T2 Gleason 7 tumors or tumors with Gleason 4 +3 (high risk) vs. all Gleason 6 tumors, any Gleason 7 tumors with clinical T1c stage or Gleason 3 +4 tumors (low risk).
