# Supplementary material
Source: PubMed Central journal article supplement (PMC2998181)

## Normalized PSA

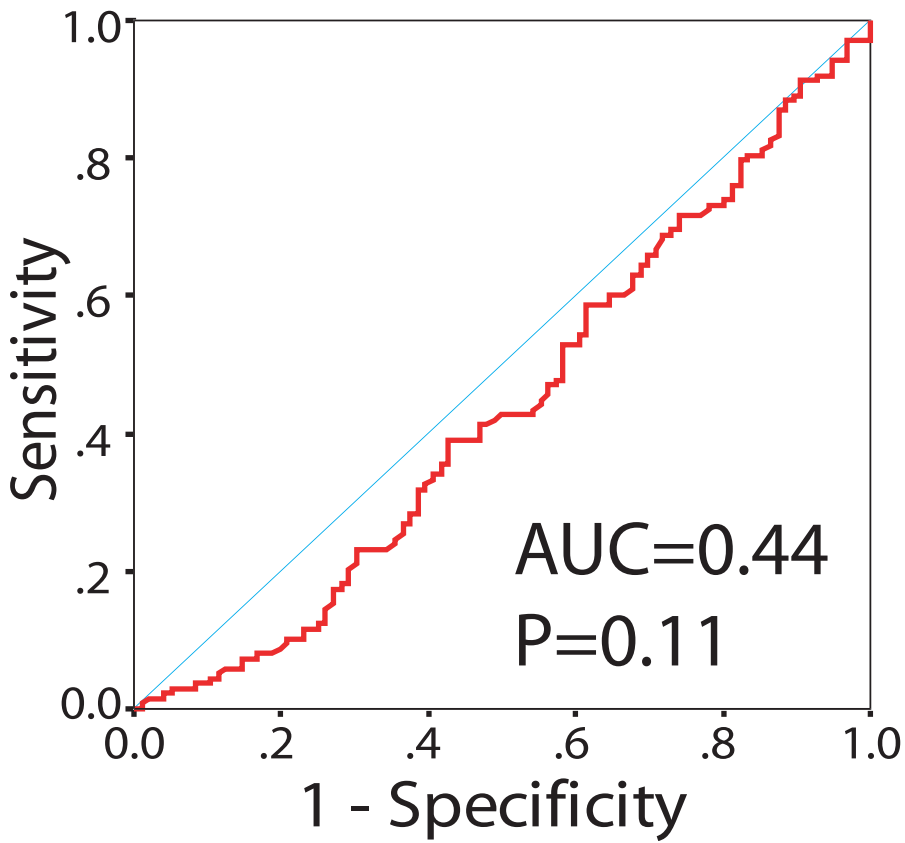

Supplement: NIHMS252533-supplement-fig_s1.pdf [file NIHMS252533-supplement-fig_s1.pdf]
